# Supplementary material
Source: MDPI journal article supplement (https://www.mdpi.com/2076-3271/10/1/2)
Supplement: s1 [file s1]

## Supplementary Material

**Table S1: Baseline characteristics and outcomes in the different vasoactive groups of patients.**

|                                     | No<br>Vasoactive<br>Treatment<br>(n=8) | ACEI/ARBs<br>(n=31) | ARNI<br>(n=22) | Norepinephrine<br>(n=12) |
|-------------------------------------|----------------------------------------|---------------------|----------------|--------------------------|
| Age [years]                         | 50.1±9.1                               | 52.4±13.0           | 50.6±10.1      | 53.1±14.4                |
| Sex, male                           | 7(87.5%)                               | 28(90%)             | 20(90.9%)      | 10(83.3%)                |
| BMI [kg/m <sup>2</sup> ]            | 24.9±5.1                               | 25.9±4.9            | 25.2±4.2       | 25.1±3.9                 |
| LVEF <35%                           | 8(93.8%)                               | 27(80%)             | 20(89%)        | 10(83.3%)                |
| Euroscore II                        | 18.7±9.2                               | 15.5±10.7           | 16.1±10.1      | 16.8±9.9                 |
| Initial Cardiac Disease Diagnosis   |                                        |                     |                |                          |
| -ICM                                | 3(37.5%)                               | 12(38.7%)           | 9(40.9%)       | 4(33.3%)                 |
| -DCM                                | 3(37.5%)                               | 11(35.4%)           | 7(31.8%)       | 4(33.3%)                 |
| -HCM                                | 1(12.5%)                               | 2(6.5%)             | 2(9.1%)        | 1(8.3%)                  |
| -Other                              | 1(12.5%)                               | 6(19.4%)            | 4(18.2%)       | 3(25%)                   |
| Two or more sternotomies            | 1(12.5%)                               | 5(16.1%)            | 4(18.2%)       | 2(16.7%)                 |
| Type of surgery                     |                                        |                     |                |                          |
| -Transplantation                    | 5(62.5%)                               | 21(68.7%)           | 16(72.7%)      | 8(66.6%)                 |
| -LVAD                               | 3(37.5%)                               | 10(32.3%)           | 6(27.3%)       | 4(33.4%)                 |
| Pump time                           | 130.6±40.5                             | 122.1±45.3          | 125.1±46.2     | 126.1±38.5               |
| GFR ml/min                          | 48.0±13.2                              | 54.1±17.6           | 62.1±21.0      | 55.6±18.7                |
| ECMO                                | 5(62.5%)                               | 13(41.9%)           | 10(45.5%)      | 6(50%)                   |
| Bleeding complications              | 5(41.7%)                               | 2(6.5%)             | 3(13.6%)       | 4(33.3%)                 |
| Documented sepsis within<br>30 days | 3(37.5%)                               | 5(16.1%)            | 5(22.7%)       | 4(33.4%)                 |
| Death at 30 days                    | 5(62.5%)                               | 6(19.4%)            | 3(13.6%)       | 4(33.4%)                 |

Plus-minus values are means±SD. No statistical comparison was made between groups because of the prior multiple testing already performed in the manuscript, and the limited size of different sub-groups. significant differences between the 2 groups for any variable. Percentages may not total 100 because of rounding. BMI indicates body mass index, LVEF left ventricular ejection fraction, ICM ischemic cardiomyopathy, DCM dilated cardiomyopathy, HCM hypertrophic cardiomyopathy, LVAD left ventricular assist device, GFR glomerular filtration rate, ECMO extra-corporeal membrane oxygenation.
